# Supplementary material for: Pharmacological CDK4/6 inhibition reveals a p53‐dependent senescent state with restricted toxicity
Source: PubMed Central journal article supplement (PMC8922251; doi:10.15252/embj.2021108946), 2022-01-05
Supplement: EMBJ-41-e108946-s002.pdf [file EMBJ-41-e108946-s002.pdf]

## Expanded View Figures

### Figure EV1. Prolonged CDK4/6i treatment induces p53-dependent cellular senescence.

- A–C Human fibroblasts (BJ) were treated with vehicle (water for 8 times in 24 h) or abemaciclib (1  $\mu$ M for 1 or 8 times in 24 h). Protein was isolated from vehicle or abemaciclib-treated cells and immunoblotted for p-Rb, Rb, and actin (A). RNA was isolated from treated cells, and mRNA levels of E2F2 gene (B) and p16 gene (C) were quantified by qPCR relative to tubulin (internal control).  $n = 3$  independent experiments.
- D–F 8-day population doubling of WI38 cells treated with vehicle, palbociclib, or abemaciclib (both 1  $\mu$ M for 8 times in 24 h;  $n = 3$  independent experiments) (D). At 8 dpt, treated WI38 cells were incubated with EdU for 10 h and stained (scale bar, 150  $\mu$ m;  $n = 6$  samples from 3 independent experiments) (E).  $3 \times 10^3$  treated WI38 cells were replated in 6-well dish, cultured for 8 days, and stained with 0.2% crystal violet ( $n = 3$  independent experiments) (F).
- G, H Cells were treated with vehicle or abemaciclib (1  $\mu$ M for 1 or 4 or 8 times in 24 h), after drug withdraw, either replated for colony formation assay ( $n = 3$  independent experiments) (G) or incubated with EdU for 10 h, and stained at 8 dpt ( $n = 9$  samples from 3 independent experiments) (H).
- I Cells were treated with vehicle or abemaciclib (250 nM or 500 nM or 1  $\mu$ M for 8 times in 24 h); after drug withdraw, the cells were replated for colony formation assay ( $n = 3$  independent experiments).
- J Representative phase-contrast images of BJ or WI38 cells at the end of each drug treatment (scale bar, 1 mm;  $n = 3$  independent experiments).
- K At 8 dpt, treated BJ cells were fixed and stained for SA- $\beta$ -gal and quantified (scale bar, 1 mm;  $n = 3$  independent experiments).
- L Whole-cell lysate of treated BJ cells was used to immunoblot for p16 ( $n = 3$  independent experiments).
- M–O RNA-sequencing was performed with human fibroblasts (BJ) treated with vehicle (water for 8 times in 24 h) or abemaciclib (1  $\mu$ M for 8 times in 24 h) ( $n = 3$  independent samples, sequenced together). Heatmap of cell cycle genes (M), senescence signature (N), and p53-repressed (red) and p53-activated (blue) cell cycle-related genes (O) calculated from RNA-seq datasets of cells 8 dpt relative to the vehicle-treated group.
- P Cells were treated with vehicle or abemaciclib (1  $\mu$ M for 8 times in 24 h); after drug withdraw, the nuclear fraction was isolated and protein extracted for Western blotting. Lamin A/C was used as the marker of nucleus and loading control ( $n = 3$  independent experiments).

Data information: Data are means  $\pm$  SD. Two-way ANOVA (B, C, and H). One-way ANOVA (D, E, and K). \*\*\* $P < 0.001$ .

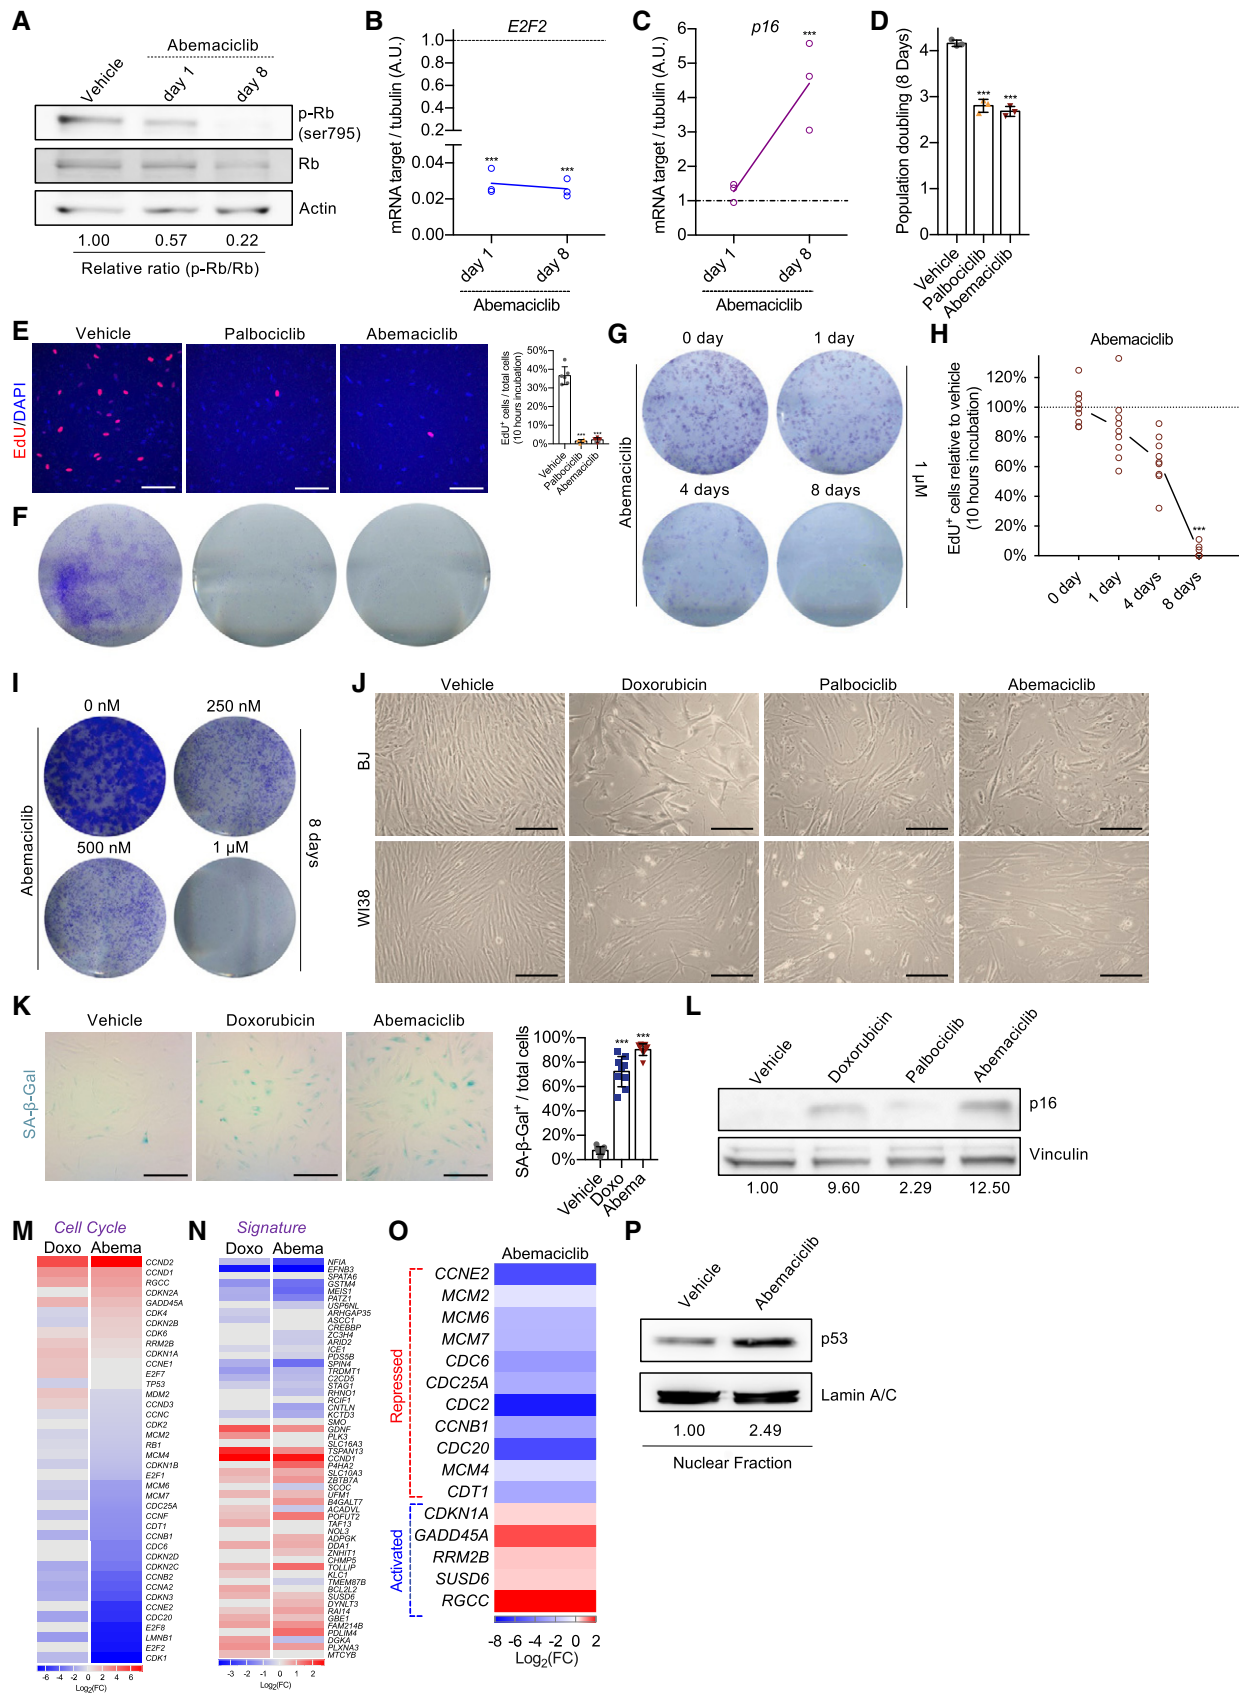

Figure EV1.

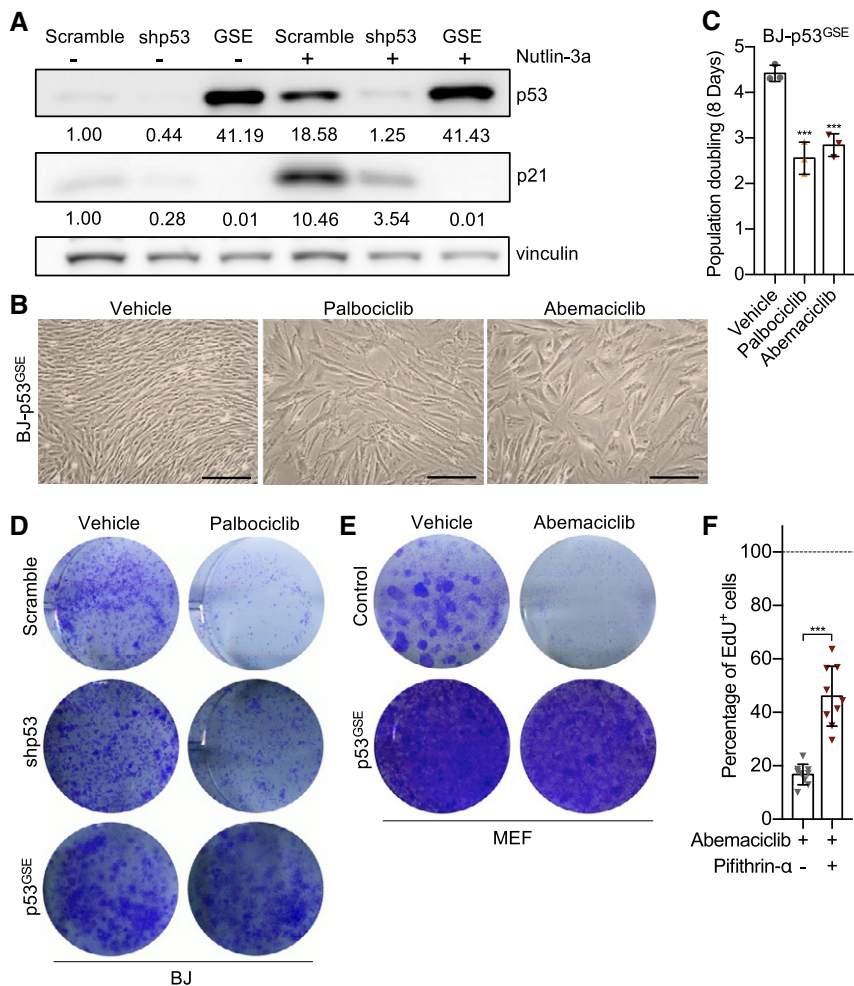

**Figure EV2. CDK4/6 induces cellular senescence dependent on p53.**

- A Immunoblot of p53 on cells of indicated genotypes and treatments.
- B Representative images of p53<sup>GSE</sup> BJ cells at the end of the 8-day indicated treatments (scale bar, 1 mm; *n* = 3 independent experiments).
- C 8-day population doubling of treated p53<sup>GSE</sup> BJ cells (*n* = 3 independent experiments).
- D  $3 \times 10^3$  vehicle or palbociclib-treated (1  $\mu$ M for 8 times in 24 h) scramble/shp53/ p53<sup>GSE</sup> BJ cells were replated in 6-well dishes, cultured for 8 days, and stained with 0.2% crystal violet (*n* = 3 independent experiments).
- E  $3 \times 10^3$  vehicle- or abemaciclib-treated (4  $\mu$ M for 8 times in 24 h) WT/p53<sup>GSE</sup> MEFs were replated in 6-well dishes, cultured for 8 days and stained with 0.2% crystal violet (*n* = 3 independent experiments).
- F BJ cells were treated with abemaciclib  $\pm$  pifithrin- $\alpha$  and EdU staining performed at 8 dpt (*n* = 9 samples from 3 independent experiments).

Data information: Data are means  $\pm$  SD. One-way ANOVA (C). Unpaired two-tailed *t*-test (F). \*\*\**P* < 0.001.

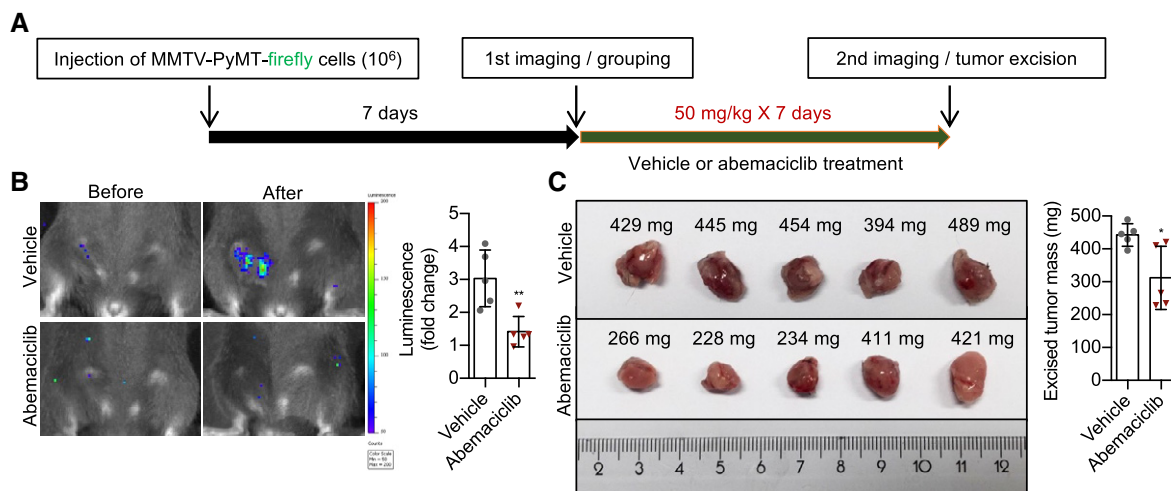

**Figure EV3.**

**Figure EV3. Senescence-inducing dose of abemaciclib inhibits tumor growth.**

A Scheme of abemaciclib treatments for MMTV-PyMT-firefly breast cancer mouse model *in vivo*.  
 B Female p16-3MR mice bearing MMTV-PyMT-firefly tumors in mammary fat pad were treated with vehicle (PBS, 7 consecutive days) or abemaciclib (50 mg/kg in PBS, 7 consecutive days). The mice were injected with D-Luciferin, and bioluminescence was visualized/quantified by the IVIS spectrum *in vivo* imaging system before and after abemaciclib treatments, as shown by representative images and quantification ( $n = 5$  mice/group).  
 C Excised tumors and quantification of tumor weights ( $n = 5$  mice/group).  
 Data information: Data are means  $\pm$  SD. Unpaired two-tailed *t*-test (B and C). \* $P < 0.05$  and \*\* $P < 0.01$ .

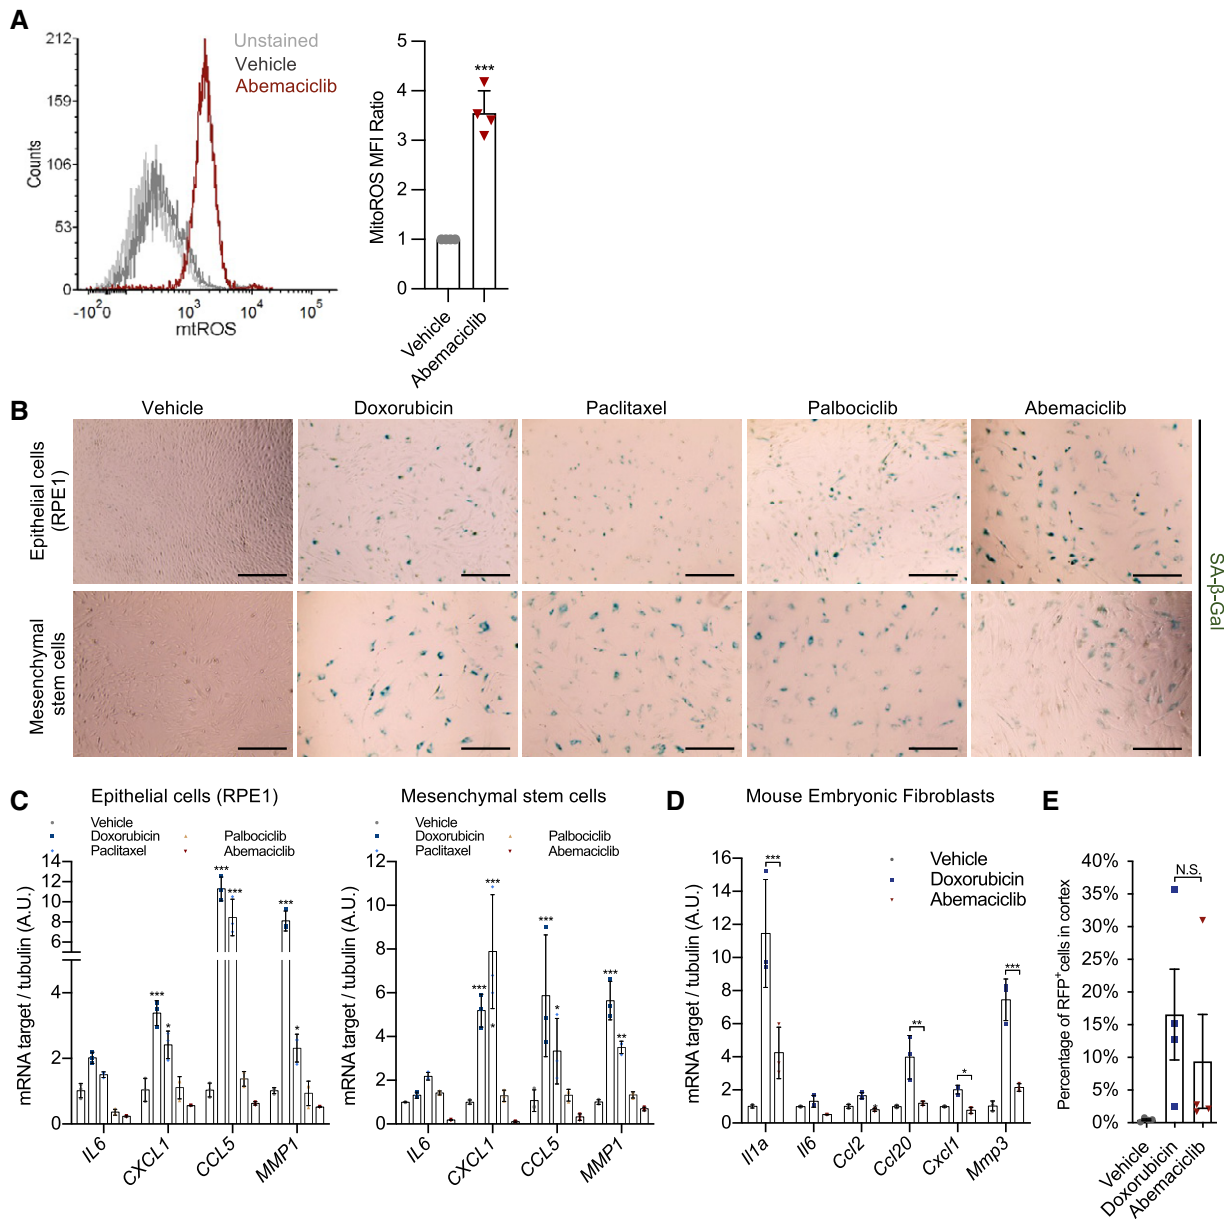

Figure EV4.

**Figure EV4. CDK4/6i induces cellular senescence without pro-inflammatory SASP.**

- A BJ cells were treated with vehicle or abemaciclib and stained for mitochondria ROS. Relative values of ROS level were plotted ( $n = 4$  independent experiments).
- B Human hTERT-RPE1 and lung mesenchymal stem cells were treated with vehicle (DMSO for 8 times in 24 h) or doxorubicin (250 nM for 24 h) or paclitaxel (50 nM for 24 h) or palbociclib (1  $\mu$ M for 8 times in 24 h) or abemaciclib (1  $\mu$ M for 8 times in 24 h). At 8 dpt, treated cells were fixed and stained for SA- $\beta$ -gal (scale bar, 1 mm;  $n = 3$  independent experiments).
- C At 8 dpt, RNA was isolated from treated cells and indicated NF- $\kappa$ B-associated SASP (NASP) genes were quantified by qRT-PCR relative to tubulin ( $n = 3$  independent experiments).
- D qRT-PCR of indicated genes was performed using mouse embryonic fibroblast (MEFs) 8 days after the indicated treatments ( $n = 3$  independent experiments).
- E RFP<sup>+</sup> cells were sorted from renal cortex of doxorubicin- or abemaciclib-treated p16-3MR mice. The percentage of RFP<sup>+</sup> cells in total cells was plotted ( $n = 4$  mice/group).

Data information: Data are means  $\pm$  SD. Two-way ANOVA (C and D). One-way ANOVA (E). \* $P < 0.05$ , \*\* $P < 0.01$ , and \*\*\* $P < 0.001$ , N.S. = not significant.

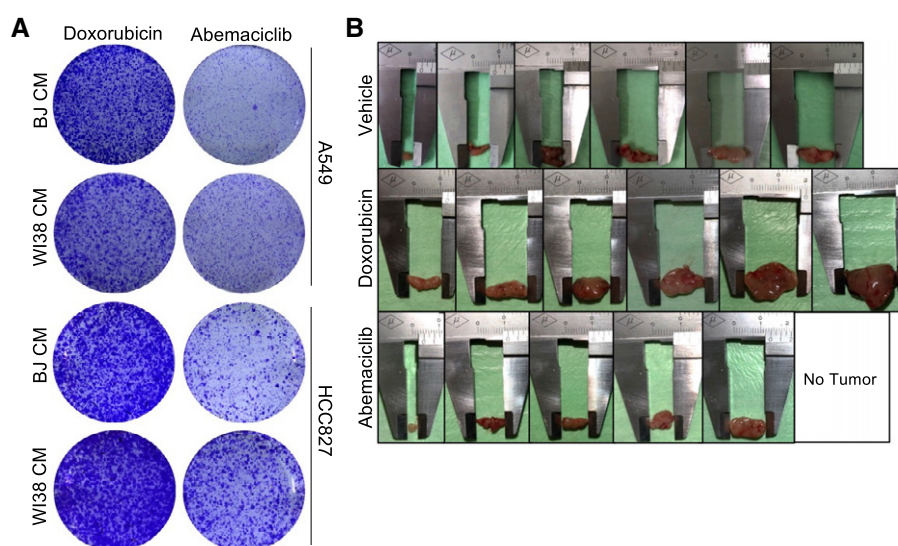**Figure EV5. p53-associated SASP lacks pro-tumorigenic properties.**

- A A549 and HCC827 lung cancer cells were incubated with drug-induced BJ or WI38 serum-free CM for 45 h. Cells were replated for colony formation assay for 8 days ( $n = 3$  independent experiments).
- B Excised tumors from Fig 5D ( $n = 6$  mice/group).
